# Supplementary material for: Effect of electrodeposition time on physical characteristics and antibacterial activity of copper-incorporated TiO 2 nanotubes
Source: Royal Society of Chemistry journal article supplement (doi:10.1039/d4ra05266h), 2025-01-01
Supplement: d4ra05266h1.pdf [file d4ra05266h1.pdf]

Supplementary information

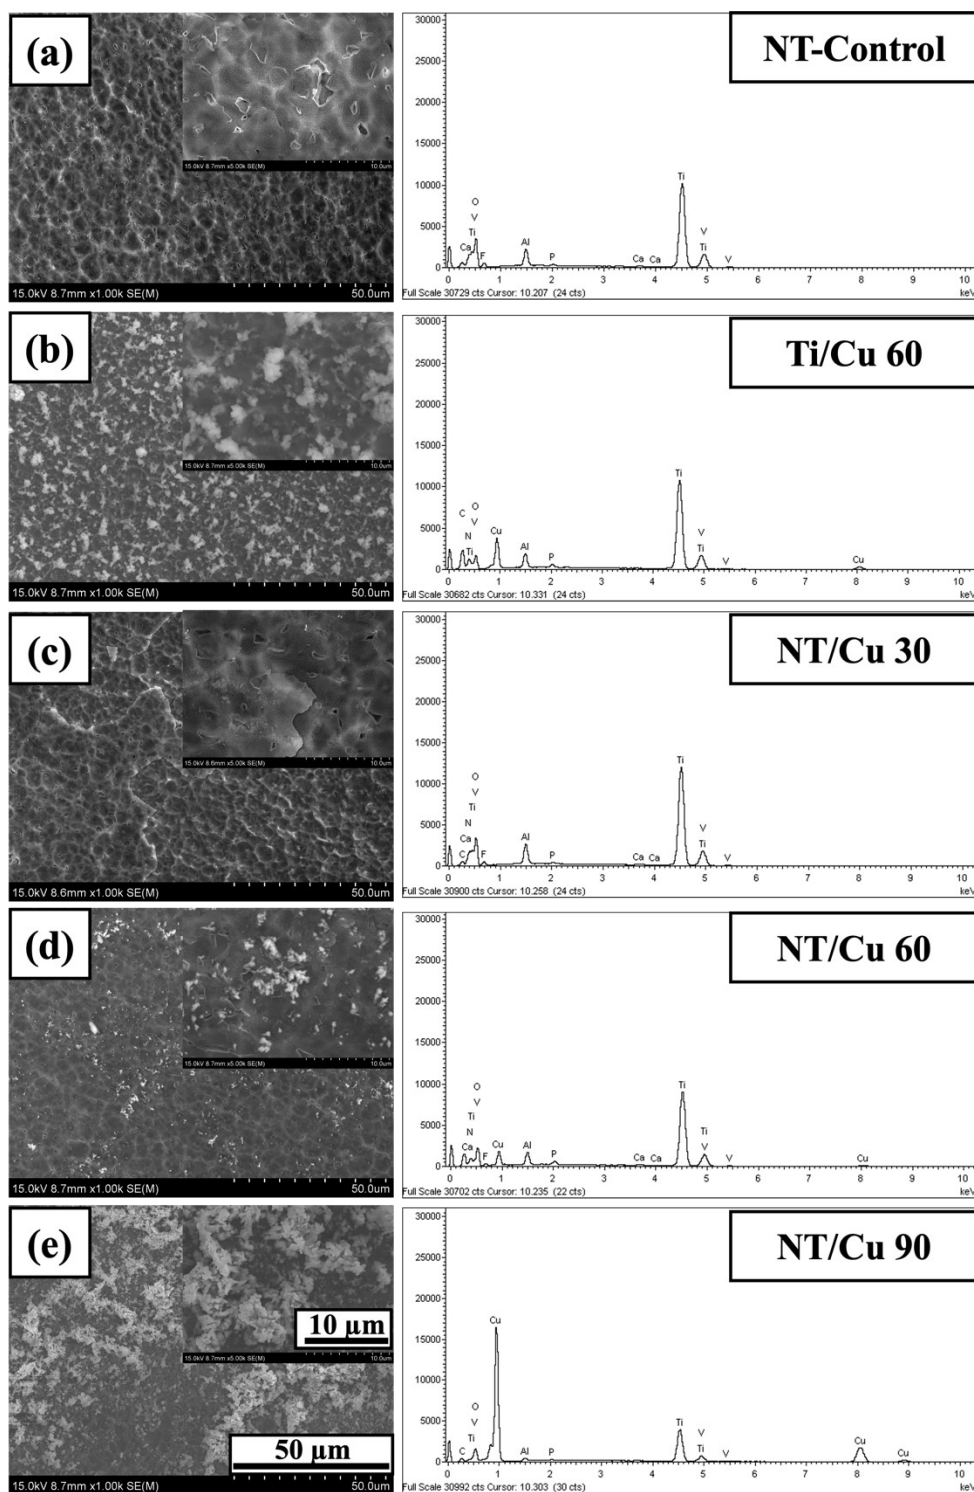

Figure S1 Low magnification SEM images are shown in (a) to (e), with high magnification SEM images (inlets) and the corresponding EDX spectra for NT, Ti/Cu, NT/Cu 30, NT/Cu 60, NT/Cu 90, respectively, following immersion in TSB.

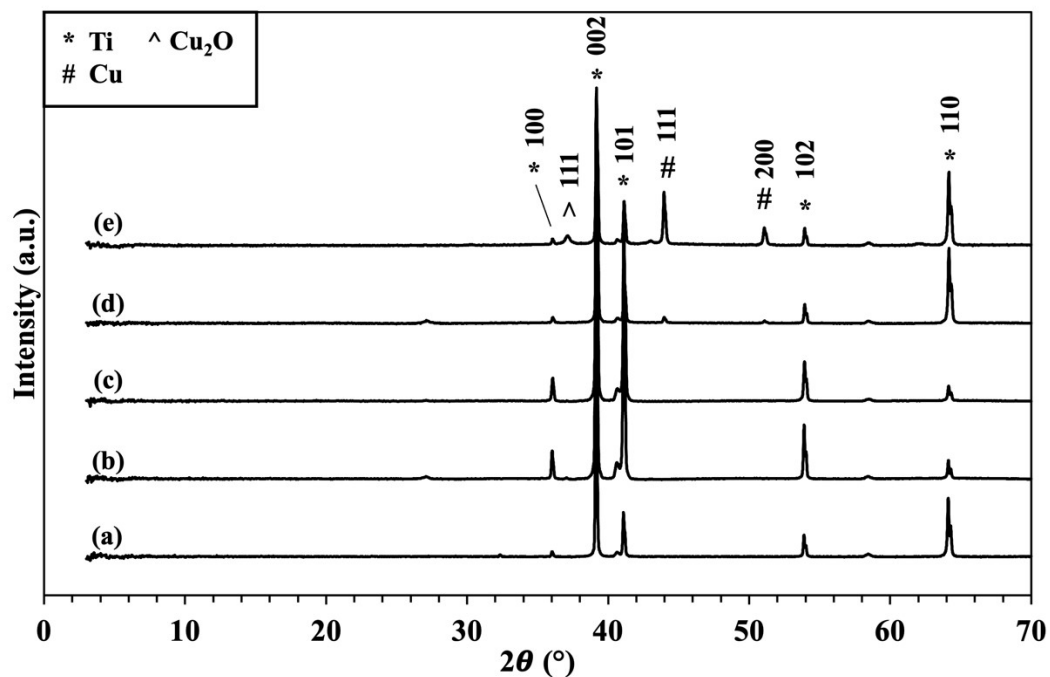

Figure S2 XRD patterns for (a) NT-Control, (b) Ti/Cu 60, (c) NT/Cu 30, (d) NT/Cu 60, and (e) NT/Cu 90, respectively, following immersion in TSB.

Table S1 Elemental composition of surfaces immediately after electrodeposition.

| Sample     | F           | Na   | Al          | P    | S           | Cl   | K    | Ti           | V           | Cu           | O            |
|------------|-------------|------|-------------|------|-------------|------|------|--------------|-------------|--------------|--------------|
| NT-Control | 7.62 ± 0.72 | 0.00 | 3.15 ± 0.23 | 0.00 | 0.00        | 0.00 | 0.00 | 50.73 ± 2.75 | 2.10 ± 0.29 | 0.00         | 36.90 ± 2.15 |
| Ti/Cu 60   | 0.00        | 0.00 | 0.22 ± 0.10 | 0.00 | 0.00        | 0.00 | 0.00 | 15.44 ± 1.91 | 0.86 ± 0.06 | 57.74 ± 2.69 | 25.73 ± 0.68 |
| NT/Cu 30   | 1.92 ± 0.23 | 0.00 | 0.93 ± 0.13 | 0.00 | 0.39 ± 0.09 | 0.00 | 0.00 | 22.53 ± 1.21 | 0.95 ± 0.08 | 44.79 ± 1.75 | 28.49 ± 0.49 |
| NT/Cu 60   | 1.08 ± 0.21 | 0.00 | 0.56 ± 0.07 | 0.00 | 0.28 ± 0.05 | 0.00 | 0.00 | 17.52 ± 1.67 | 0.78 ± 0.11 | 53.47 ± 2.77 | 26.68 ± 0.59 |
| NT/Cu 90   | 0.00        | 0.00 | 0.12 ± 0.02 | 0.00 | 0.00        | 0.00 | 0.00 | 8.86 ± 2.87  | 0.50 ± 0.19 | 67.27 ± 5.65 | 23.31 ± 1.04 |

Table S2 Elemental composition of surfaces after immersion in DPBS.

| Sample     | F      | Na      | Al     | P      | S    | Cl      | K      | Ti      | V      | Cu      | O       |
|------------|--------|---------|--------|--------|------|---------|--------|---------|--------|---------|---------|
| NT-Control | 5.68 ± | 5.24 ±  | 2.71 ± | 0.45 ± | 0.00 | 4.94 ±  | 0.19 ± | 46.21 ± | 1.82 ± | 0.00    | 34.72 ± |
|            | 1.72   | 5.59    | 0.58   | 0.05   |      | 5.76    | 0.06   | 6.61    | 0.24   |         | 3.87    |
| Ti/Cu 60   | 0.00   | 4.78 ±  | 1.77 ± | 3.52 ± | 0.00 | 3.40 ±  | 0.24 ± | 35.57 ± | 1.63 ± | 14.72 ± | 35.05 ± |
|            |        | 2.98    | 0.75   | 2.18   |      | 2.16    | 0.01   | 12.01   | 0.51   | 6.99    | 2.09    |
| NT/Cu 30   | 2.92 ± | 3.27 ±  | 1.94 ± | 3.56 ± | 0.00 | 1.40 ±  | 0.17 ± | 34.84 ± | 1.35 ± | 15.06 ± | 35.59 ± |
|            | 1.09   | 0.98    | 0.41   | 1.50   |      | 0.47    | 0.03   | 6.1     | 0.21   | 5.65    | 0.89    |
| NT/Cu 60   | 0.00   | 12.35 ± | 0.24 ± | 9.50 ± | 0.00 | 10.92 ± | 0.32 ± | 6.64 ±  | 0.39 ± | 30.73 ± | 29.14 ± |
|            |        | 3.39    | 0.08   | 1.46   |      | 5.36    | 0.12   | 1.71    | 0.06   | 6.07    | 1.8     |
| NT/Cu 90   | 1.15 ± | 0.00    | 0.41 ± | 0.71 ± | 0.00 | 0.55 ±  | 0.00   | 12.42 ± | 0.55 ± | 59.90 ± | 25.08 ± |
|            | 0.26   |         | 0.35   | 0.48   |      | 0.14    |        | 5.94    | 0.19   | 10.10   | 2.49    |

Table S3 Elemental composition of surfaces after immersion in TSB.

| Sample     | N      | F      | Na     | Al     | P      | Cl     | Ca     | Ti      | V      | Cu      | O       |
|------------|--------|--------|--------|--------|--------|--------|--------|---------|--------|---------|---------|
| NT-Control | 0.00   | 8.27 ± | 0.26 ± | 3.54 ± | 0.38 ± | 0.00   | 0.21 ± | 57.57 ± | 2.38 ± | 0.00    | 31.84 ± |
|            |        | 0.82   | 0.024  | 0.33   | 0.06   |        | 0.02   | 5.03    | 0.20   |         | 3.76    |
| Ti/Cu 60   | 2.07 ± | 0.00   | 0.00   | 2.37 ± | 0.63 ± | 0.00   | 0.00   | 42.45 ± | 1.84 ± | 11.34 ± | 39.94 ± |
|            | 0.96   |        |        | 0.43   | 0.07   |        |        | 5.82    | 0.26   | 5.31    | 0.43    |
| NT/Cu 30   | 0.00   | 6.50 ± | 0.00   | 3.64 ± | 0.41 ± | 0.00   | 0.27 ± | 59.73 ± | 2.29 ± | 0.00    | 31.94 ± |
|            |        | 0.49   |        | 0.22   | 0.04   |        | 0.03   | 3.47    | 0.22   |         | 2.47    |
| NT/Cu 60   | 0.00   | 4.22 ± | 0.00   | 2.83 ± | 0.86 ± | 0.00   | 0.31 ± | 46.92 ± | 1.98 ± | 14.03 ± | 31.80 ± |
|            |        | 0.46   |        | 0.15   | 0.03   |        | 0.02   | 2.20    | 0.17   | 1.93    | 0.87    |
| NT/Cu 90   | 0.00   | 0.88 ± | 0.00   | 1.07 ± | 0.20 ± | 0.14 ± | 0.00   | 23.59 ± | 1.02 ± | 45.86 ± | 58.26 ± |
|            |        | 0.12   |        | 0.35   | 0.03   | 0.00   |        | 4.52    | 0.16   | 5.91    | 1.03    |
